# Supplementary material for: Investigation on the Efficiency of Chinese Herbal Injections for Treating Non-small Cell Lung Cancer With Vinorelbine and Cisplatin Based on Multidimensional Bayesian Network Meta-Analysis
Source: PubMed Central journal article supplement (PMC7941272; doi:10.3389/fphar.2020.631170), 2021-01-29
Supplement: datasheet1.pdf [file datasheet1.pdf]

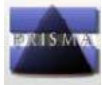

# PRISMA 2009 Checklist

| Section/Topic                      | #  | Checklist Item                                                                                                                                                                                                                                                                                              | Reported on Page # |
|------------------------------------|----|-------------------------------------------------------------------------------------------------------------------------------------------------------------------------------------------------------------------------------------------------------------------------------------------------------------|--------------------|
| <b>TITLE</b>                       |    |                                                                                                                                                                                                                                                                                                             |                    |
| Title                              | 1  | Identify the report as a systematic review, meta-analysis, or both.                                                                                                                                                                                                                                         | 1                  |
| <b>ABSTRACT</b>                    |    |                                                                                                                                                                                                                                                                                                             |                    |
| Structured summary                 | 2  | Provide a structured summary including, as applicable: background; objectives; data sources; study eligibility criteria, participants, and interventions; study appraisal and synthesis methods; results; limitations; conclusions and implications of key findings; systematic review registration number. | 1-2                |
| <b>INTRODUCTION</b>                |    |                                                                                                                                                                                                                                                                                                             |                    |
| Rationale                          | 3  | Describe the rationale for the review in the context of what is already known.                                                                                                                                                                                                                              | 2                  |
| Objectives                         | 4  | Provide an explicit statement of questions being addressed with reference to participants, interventions, comparisons, outcomes, and study design (PICOS).                                                                                                                                                  | 2-3                |
| <b>METHODS</b>                     |    |                                                                                                                                                                                                                                                                                                             |                    |
| Protocol and registration          | 5  | Indicate if a review protocol exists, if and where it can be accessed (e.g., Web address), and, if available, provide registration information including registration number.                                                                                                                               | /                  |
| Eligibility criteria               | 6  | Specify study characteristics (e.g., PICOS, length of follow-up) and report characteristics (e.g., years considered, language, publication status) used as criteria for eligibility, giving rationale.                                                                                                      | 3-4                |
| Information sources                | 7  | Describe all information sources (e.g., databases with dates of coverage, contact with study authors to identify additional studies) in the search and date last searched.                                                                                                                                  | 3                  |
| Search                             | 8  | Present full electronic search strategy for at least one database, including any limits used, such that it could be repeated.                                                                                                                                                                               | 3                  |
| Study selection                    | 9  | State the process for selecting studies (i.e., screening, eligibility, included in systematic review, and, if applicable, included in the meta-analysis).                                                                                                                                                   | 4-5                |
| Data collection process            | 10 | Describe method of data extraction from reports (e.g., piloted forms, independently, in duplicate) and any processes for obtaining and confirming data from investigators.                                                                                                                                  | 4-5                |
| Data items                         | 11 | List and define all variables for which data were sought (e.g., PICOS, funding sources) and any assumptions and simplifications made.                                                                                                                                                                       | 4-5                |
| Risk of bias in individual studies | 12 | Describe methods used for assessing risk of bias of individual studies (including specification of whether this was done at the study or outcome level), and how this information is to be used in any data synthesis.                                                                                      | 4-5                |
| Summary measures                   | 13 | State the principal summary measures (e.g., risk ratio, difference in means).                                                                                                                                                                                                                               | 5                  |
| Synthesis of results               | 14 | Describe the methods of handling data and combining results of studies, if done, including measures of consistency (e.g., $I^2$ ) for each meta-analysis.                                                                                                                                                   | 5                  |



# PRISMA 2009 Checklist

| Section/Topic                 | #  | Checklist Item                                                                                                                                                                                           | Reported on Page # |
|-------------------------------|----|----------------------------------------------------------------------------------------------------------------------------------------------------------------------------------------------------------|--------------------|
| Risk of bias across studies   | 15 | Specify any assessment of risk of bias that may affect the cumulative evidence (e.g., publication bias, selective reporting within studies).                                                             | 5                  |
| Additional analyses           | 16 | Describe methods of additional analyses (e.g., sensitivity or subgroup analyses, meta-regression), if done, indicating which were pre-specified.                                                         | 5                  |
| <b>RESULTS</b>                |    |                                                                                                                                                                                                          |                    |
| Study selection               | 17 | Give numbers of studies screened, assessed for eligibility, and included in the review, with reasons for exclusions at each stage, ideally with a flow diagram.                                          | 6                  |
| Study characteristics         | 18 | For each study, present characteristics for which data were extracted (e.g., study size, PICOS, follow-up period) and provide the citations.                                                             | 6                  |
| Risk of bias within studies   | 19 | Present data on risk of bias of each study and, if available, any outcome level assessment (see item 12).                                                                                                | 6                  |
| Results of individual studies | 20 | For all outcomes considered (benefits or harms), present, for each study: (a) simple summary data for each intervention group (b) effect estimates and confidence intervals, ideally with a forest plot. | 6-8                |
| Synthesis of results          | 21 | Present the main results of the review. If meta-analyses done, include for each, confidence intervals and measures of consistency.                                                                       | 9                  |
| Risk of bias across studies   | 22 | Present results of any assessment of risk of bias across studies (see Item 15).                                                                                                                          | 9                  |
| Additional analysis           | 23 | Give results of additional analyses, if done (e.g., sensitivity or subgroup analyses, meta-regression [see Item 16]).                                                                                    | 8                  |
| <b>DISCUSSION</b>             |    |                                                                                                                                                                                                          |                    |
| Summary of evidence           | 24 | Summarize the main findings including the strength of evidence for each main outcome; consider their relevance to key groups (e.g., healthcare providers, users, and policy makers).                     | 9                  |
| Limitations                   | 25 | Discuss limitations at study and outcome level (e.g., risk of bias), and at review-level (e.g., incomplete retrieval of identified research, reporting bias).                                            | 9-10               |
| Conclusions                   | 26 | Provide a general interpretation of the results in the context of other evidence, and implications for future research.                                                                                  | 10                 |
| <b>FUNDING</b>                |    |                                                                                                                                                                                                          |                    |
| Funding                       | 27 | Describe sources of funding for the systematic review and other support (e.g., supply of data); role of funders for the systematic review.                                                               | 10                 |

From: Moher D, Liberati A, Tetzlaff J, Altman DG, The PRISMA Group (2009). Preferred Reporting Items for Systematic Reviews and Meta-Analyses: The PRISMA Statement. PLoS Med 6(6): e1000097. doi:10.1371/journal.pmed1000097

For more information, visit: [www.prisma-statement.org](http://www.prisma-statement.org).

## The search strategy used in the English databases

### 1. Search strategy of Pubmed

- #1 Non-Small-Cell Lung Carcinomas [MeSH Terms]
- #2 Non-Small-Cell Lung Carcinoma [Title/Abstract]
- #3 Nonsmall Cell Lung Cancer [Title/Abstract]
- #4 Non Small Cell Lung Carcinoma [Title/Abstract]
- #5 Non-Small Cell Lung Carcinoma [Title/Abstract]
- #6 Non-Small Cell Lung Cancer [Title/Abstract]
- #7 #1 OR #2 OR #3 OR #4 OR #5 OR #6
- #8 Shenmai[Title/Abstract]
- #9 Delisheng[Title/Abstract]
- #10 Astragalus[Title/Abstract]
- #11 Huangqi[Title/Abstract]
- #12 Shengmai[Title/Abstract]
- #13 Chansu[Title/Abstract]
- #14 Toad venom[Title/Abstract]
- #15 Huachansu[Title/Abstract]
- #16 Cinobufacini[Title/Abstract]
- #17 Shenfu[Title/Abstract]
- #18 Yadanziyouru[Title/Abstract]
- #19 Javanica oil emulsion[Title/Abstract]
- #20 Xiaoaiping[Title/Abstract]
- #21 Marsdenia Tenacissima[Title/Abstract]
- #22 Kangai[Title/Abstract]
- #23 Aidi[Title/Abstract]
- #24 Shenqifuzheng[Title/Abstract]
- #25 Kanglaite[Title/Abstract]
- #26 Compound matrine[Title/Abstract]
- #27 Fufangkushen[Title/Abstract]
- #28 Compound Kushen[Title/Abstract]
- #29 #8 OR #9 OR #10 OR #11 OR #12 OR #13 OR #14 OR #15 OR #16 OR #17 OR #18 OR #19 OR #20 OR #21 OR #22 OR #23 OR #24 OR #25 OR #26 OR #27 OR #28
- #30 randomized controlled trial[Publication Type]
- #31 controlled clinical trial[Publication Type]
- #32 randomized[Title/Abstract]
- #33 placebo[Title/Abstract]
- #34 randomly[Title/Abstract]
- #35 trial[Title/Abstract]
- #36 groups[Title/Abstract]
- #37 "drug therapy" [Subheading]
- #38 #30 OR #31 OR #32 OR #33 OR #34 OR #36 OR #37 OR #38
- #39 #7 AND #29 AND #38

## 2. Search strategy of Embase

#1 random\*

#2 placebo\*

#3 doubl\* adj blind\*

#4 singl\* adj blind\*

#5 assign\*

#6 allocat\*

#7 "double-blind procedure"/exp

#8 "randomized controlled trial"/exp

#9 "single-blind procedure"/exp

#10 #1 or #2 or #3 or #4 or #5 or #6 or #7 or #8 or #9

#11 " Non-Small-Cell Lung Carcinomas '/exp

#12 Non-Small-Cell Lung Carcinoma

#13 Nonsmall Cell Lung Cancer

#14 Non Small Cell Lung Carcinoma

#15 Non-Small Cell Lung Carcinoma

#16 Non-Small Cell Lung Cancer

#17 #11 OR #12 OR #13 OR #14 OR #15 OR #16

#18 shenmai

#19 delisheng

#20 huangqi

#21 astragalus

#22 shengmai

#23 chansu

#24 toad AND venom

#25 huachansu

#26 cinobufacini

#27 shenfu

#28 yadanziyouru

#29 javanica AND oil AND emulsion

#30 xiaoaping

#31 marsdenia AND tenacissima

#32 kangai

#33 aidi

#34 shenqifuzheng

#35 kanglaite

#36 compound AND matrine

#37 compound AND kushen

#38 fufangkushen

#39 #18 OR #19 OR #20 OR #21 OR #22 OR #23 OR #24 OR #25 OR #26 OR  
#27 OR #28 OR #29 OR #30 OR #31 OR #32 OR #33 OR #34 OR #35 OR #36 OR  
#37 OR #38

#46 #10 AND #17 AND #39

### 3. Search strategy of Cochrane Library

#1 random\*

#2 shenmai: ti,ab,kw

#3 delisheng: ti,ab,kw

#4 huangqi: ti,ab,kw

#5 astragalus: ti,ab,kw

#6 shengmai: ti,ab,kw

#7 chansu: ti,ab,kw

#8 toad AND venom: ti,ab,kw

#9 huachansu: ti,ab,kw

#10 cinobufacini: ti,ab,kw

#11 shenfu: ti,ab,kw

#12 yadanziyouru: ti,ab,kw

#13 javanica AND oil AND emulsion : ti,ab,kw

#14 xiaoaiping: ti,ab,kw

#15 marsdenia AND tenacissima: ti,ab,kw

#16 kangai: ti,ab,kw

#17 aidi: ti,ab,kw

#18 shenqifuzheng: ti,ab,kw

#19 kanglaite: ti,ab,kw

#20 compound AND matrine: ti,ab,kw

#21 compound AND kushen: ti,ab,kw

#22 fufangkushen: ti,ab,kw

#23 #2 or #3 or #4 or #5 or #6 or #7 or #8 or #9 #10 #11 OR #12 OR #13 OR #14

OR #15 OR #16 #17 #18 OR #19 OR #20 OR #21 OR #22

#24 Non-Small-Cell Lung Carcinomas: MeSH descriptor

#25 #1 AND #23 AND #24

### Information about the included injections

| Name of injection    | Source                                                                               | Species /Raw materials                                                                                                                                                           | Botanical plant names                                                                                                                    | Component ingredients to be measured                           | Therapeutic claims in TCM                                                  | Indication                                                                                                 | Adverse drug reactions                                                                                                                       | Quality control reported? (Y/N)                                                                 | Chemical analysis reported? (Y/N) |
|----------------------|--------------------------------------------------------------------------------------|----------------------------------------------------------------------------------------------------------------------------------------------------------------------------------|------------------------------------------------------------------------------------------------------------------------------------------|----------------------------------------------------------------|----------------------------------------------------------------------------|------------------------------------------------------------------------------------------------------------|----------------------------------------------------------------------------------------------------------------------------------------------|-------------------------------------------------------------------------------------------------|-----------------------------------|
| Aidi injection       | Guizhou Yibai Pharmaceutical Co., Ltd.                                               | <i>Mylabris</i> 1.5g (animal drug),<br><i>Ginseng Radix Et Rhizoma</i> 50g,<br><i>Astmgali Radix</i> 100g,<br><i>Acanthopanax Senticosus Radix Et Rhizoma</i> Seu<br>Caulis 150g | <i>Panax ginseng C.A.Mey.;</i><br><i>Astragalus mongholicus Bunge.;</i><br><i>Eleutherococcus senticosus (Rupr. &amp; Maxim.) Maxim.</i> | Ginsenoside Re, > 2mg/10mL;<br>Cantharidin, 0.008-0.030mg/10mL | Clearing heat and detoxifying, dissipating blood stasis and removing knots | Primary liver cancer, lung cancer, rectal cancer, malignant lymphoma, gynecological malignant tumors, etc. | Patients occasionally have flushing, urticaria, fever, and very few patients have palpitations, chest tightness, nausea and other reactions. | Y-National Pharmaceutical Standard Z52020236; Standard number: WS <sub>3</sub> -B-380 9-99-2002 | N                                 |
| Astragalus injection | Harbin Zhenbaos Pharmaceutical Co., Ltd.;<br>Shanghai Fuda Pharmaceutical Co., Ltd.; | <i>Astmgali Radix</i> 20g                                                                                                                                                        | <i>Astragalus mongholicus Bunge.</i>                                                                                                     | Astragaloside IV, > 0.08mg/mL                                  | Immunomodulator                                                            | Adjuvant therapy for malignant tumors                                                                      | Allergic reactions; dyspnea, chest tightness; phlebitis, atrial                                                                              | Y-Standard number: WS <sub>3</sub> -B-333 5-98                                                  | N                                 |

Chengdu DIAO  
Jiuhong  
Pharmaceutical  
Factory;  
Zhengdaqingchun  
bao  
Pharmaceutical  
Co., Ltd.;  
Shanghai Hefeng  
Pharmaceutical  
Co., Ltd.;  
Dali  
Pharmaceutical  
Co., Ltd.;  
WuxiJiMinKeXin  
ShanHePharmace  
utical Co. Ltd.;  
Shineway  
Pharmaceutical  
Group Ltd.;  
Shanghai Xinya  
Pharmaceutical  
Gaoyou Co., Ltd.;  
Shanxi Jinxin  
Shuanghe  
Pharmaceutical

fibrillation;  
liver damage,  
vomiting,  
diarrhea;  
headache,  
kidney damage;  
rare hemolytic  
anemia

Co., Ltd.;  
Heilongjiangzbd  
Pharmaceutical  
Co.,Ltd.;  
Zhejiang Jiuxu  
Pharmaceutical  
Co., Ltd.;  
HARBIN  
SANCTITY  
BIOLOGICAL  
PHARMACEUTI  
CAL CO.,LTD.

|                                 |                                                                                           |                                                                             |                                                                                           |                                |                                                            |                                                                                                                        |                                                                                  |                                                                                                                                |   |
|---------------------------------|-------------------------------------------------------------------------------------------|-----------------------------------------------------------------------------|-------------------------------------------------------------------------------------------|--------------------------------|------------------------------------------------------------|------------------------------------------------------------------------------------------------------------------------|----------------------------------------------------------------------------------|--------------------------------------------------------------------------------------------------------------------------------|---|
| Chansu<br>injection             | Jiangsu Pujin<br>Pharmaceutical<br>Co., Ltd.;<br>Anhui Koyo<br>Pharmaceutical<br>Co.,Ltd. | <i>Bufois</i><br><i>Venenum</i> 2g<br>(animal<br>drug)                      | -                                                                                         | Serotonin<br>, >18.0 μ<br>g/mL | Clearing<br>heat and<br>detoxifyin<br>g                    | Acute and<br>chronic<br>suppurative<br>infections;<br>can also be<br>used as an<br>adjuvant<br>antineoplast<br>ic drug | Pain, allergic<br>reactions, poor<br>intravenous<br>drip                         | Y-National<br>Pharmaceuti<br>cal Standard<br>Z32020694,<br>Z34020603;<br>Standard<br>number:<br>WS <sub>3</sub> -B-335<br>4-98 | N |
| Compound<br>kushen<br>injection | Shanxi Zhendong<br>Pharmaceutical<br>Co., Ltd.                                            | <i>Radix</i><br><i>Sophorae</i><br><i>Flavescens</i><br>1400g,<br>Baituling | <i>Sophora</i><br><i>flavescens</i><br><i>Aiton</i> ;<br><i>Smilax</i><br><i>china L.</i> | Matrine,<br>><br>18mg/mL       | Clearing<br>heat and<br>dampness<br>, cooling<br>blood and | Cancer pain<br>and<br>bleeding                                                                                         | No obvious<br>systemic side<br>effects, mild<br>irritation when<br>used locally, | Y-National<br>Pharmaceuti<br>cal Standard<br>Z14021231,<br>Standard                                                            | N |



|                            |                                                     |                                                                                                                               |                                                                                   |                                                                                                                                                                                                   |                                                                                                                 |                                                                                                                                                                                                                                                       |                                                                                                                                                                                                                                                                          |                                                                                                                                        |   |
|----------------------------|-----------------------------------------------------|-------------------------------------------------------------------------------------------------------------------------------|-----------------------------------------------------------------------------------|---------------------------------------------------------------------------------------------------------------------------------------------------------------------------------------------------|-----------------------------------------------------------------------------------------------------------------|-------------------------------------------------------------------------------------------------------------------------------------------------------------------------------------------------------------------------------------------------------|--------------------------------------------------------------------------------------------------------------------------------------------------------------------------------------------------------------------------------------------------------------------------|----------------------------------------------------------------------------------------------------------------------------------------|---|
|                            |                                                     | 600g                                                                                                                          |                                                                                   |                                                                                                                                                                                                   | detoxifyin<br>g,<br>dispersing<br>knots and<br>relieving<br>pain                                                |                                                                                                                                                                                                                                                       | but good<br>absorption                                                                                                                                                                                                                                                   | number:<br>WS <sub>3</sub> -B-275<br>2-97                                                                                              |   |
| Delishen<br>g<br>injection | Beijing<br>Zhengbang<br>Pharmaceutical<br>Co., Ltd. | <i>Red Ginseng,<br/>Astmgali<br/>Radix,<br/>Bufonis<br/>Venenum<br/>(animal<br/>drug),<br/>Mylabris<br/>(animal<br/>drug)</i> | <i>Panax<br/>ginseng<br/>C.A.Mey.;<br/>Astragalus<br/>mongholic<br/>us Bunge.</i> | Total<br>solids, ><br>20mg/mL;<br>Anhydrou<br>s glucose,<br>><br>3.5mg/mL<br>;<br>Total<br>amount of<br>bufonis<br>toxin and<br>bufonisin,<br>12-18μg/<br>mL;<br>Cantharidi<br>n, 14-18<br>μ g/mL | Benefitin<br>g Qi,<br>promoting<br>healthines<br>s,<br>eliminatin<br>g<br>symptoms<br>and<br>resolving<br>knots | Syndrome<br>of Qi<br>Deficiency<br>and Stasis<br>in Middle<br>and Late<br>Stage<br>Primary<br>Hepatocellu<br>lar<br>Carcinoma<br>is<br>characterize<br>d by right<br>costal and<br>abdominal<br>mass, pain,<br>abdominal<br>distension<br>and lack of | Frequent<br>urination,<br>urgency, etc.,<br>urinary system<br>irritation<br>symptoms,<br>occasionally<br>hematuria and<br>proteinuria can<br>be seen; liver<br>and kidney<br>damage may<br>occur,<br>occasionally<br>nausea and<br>vomiting,<br>abdominal<br>distension. | Y-National<br>Pharmaceuti<br>cal Standard<br>Z20010135,<br>National<br>Drug<br>Standard<br>WS <sub>3</sub> -134(Z-<br>019)-2006(Z<br>) | N |

food,  
fatigue and  
fatigue.

|                     |                                               |                                                                                       |                                                                      |                                                    |                                                       |                                                         |                                                                                                                                                           |                                                                                                       |   |
|---------------------|-----------------------------------------------|---------------------------------------------------------------------------------------|----------------------------------------------------------------------|----------------------------------------------------|-------------------------------------------------------|---------------------------------------------------------|-----------------------------------------------------------------------------------------------------------------------------------------------------------|-------------------------------------------------------------------------------------------------------|---|
| Huachansu injection | Anhui Huarun Jinchan Pharmaceutical Co., Ltd. | Toad skin (animal drug)                                                               | -                                                                    | Serotonin, >0.50% (mg/ml)                          | Detoxification, detumescence and pain relief          | Middle and late stage tumors, chronic hepatitis B, etc. | Vascular stimulation; neutropenia; sinus bradycardia or tachycardia, chest tightness, palpitations, blood pressure changes; allergies, anaphylactic shock | Y-National Pharmaceutical Standard Z34020274, National executive standard WS <sub>3</sub> -B-304-5-98 | N |
| Kangai injection    | Changbaishan Pharmaceutical Co., Ltd.         | <i>Astmngali Radix</i> 300g, <i>Ginseng Radix Et Rhizoma</i> 100g, <i>Matrine</i> 10g | <i>Astragalus mongholicus Bunge.</i> ; <i>Panax ginseng C.A.Mey.</i> | Total amount of ginsenoside Rg1 and Re, > 0.1mg/mL | Invigorating Qi, strengthening immune function of the | Primary liver cancer, lung cancer, rectal cancer,       | Chills, fever, allergic-like reactions; rash, itching, flushing; nausea, vomiting,                                                                        | Y-National Pharmaceutical Standard Z20026868, Standard number: Ws-11222                               | N |

|                     |                                             |                                                                                                           |                             |                                |                                                                          |                                                                                                                             |                                                                                                                                        |                                                                                                            |   |
|---------------------|---------------------------------------------|-----------------------------------------------------------------------------------------------------------|-----------------------------|--------------------------------|--------------------------------------------------------------------------|-----------------------------------------------------------------------------------------------------------------------------|----------------------------------------------------------------------------------------------------------------------------------------|------------------------------------------------------------------------------------------------------------|---|
|                     |                                             | (Chemical medicine)                                                                                       |                             | ; Oxymatrine, 9.0-11.0mg/mL    | body                                                                     | malignant lymphoma and gynecological malignant tumors; leukopenia and hypoxia caused by various causes; chronic hepatitis B | abdominal pain; chest tightness, palpitations, dizziness, headache, difficulty breathing, etc.                                         | (ZD-1222)-2002                                                                                             |   |
| Kanglaite injection | Zhejiang Kanglaite Pharmaceutical Co., Ltd. | Coix seed oil for injection 100g, Soy lecithin for injection, Glycerin for injection, Water for Injection | <i>Coix lacryma-jobi L.</i> | Glycerol trioleate, > 12.0mg/g | Reinforcing Qi, nourishing Yin, eliminating symptoms and resolving knots | Primary non-small cell lung cancer and primary liver cancer with deficiency of both qi and Yin and                          | Occasionally, fat allergies, increased body temperature, mild nausea, and chills, most of the symptoms can disappear naturally after 3 | Y-National Pharmaceutical Standard Z10970091, National Food and Drug Administration National Drug Standard | N |

dampness due to spleen deficiency should not be operated on; combined with radiotherapy and chemotherapy, it has certain enhancement operation; it has certain anti-cachexia and analgesic effect for patients with advanced cancer.

to 5 days of use. Occasional mild phlebitis

WS3-301 (Z-038) -2006 (Z) -2013

|                   |                                                                                                                              |                                                        |                                                                        |                                                                            |                                                                                              |                                                                                                                                                      |                                                                                                                     |                                                                                                                 |   |
|-------------------|------------------------------------------------------------------------------------------------------------------------------|--------------------------------------------------------|------------------------------------------------------------------------|----------------------------------------------------------------------------|----------------------------------------------------------------------------------------------|------------------------------------------------------------------------------------------------------------------------------------------------------|---------------------------------------------------------------------------------------------------------------------|-----------------------------------------------------------------------------------------------------------------|---|
| Shenfu injection  | China Resources Sanjiu (Ya'an) Medical & Pharmaceutical CO., LTD.; Ya'an Sanjiu Pharmaceutical Co., Ltd.                     | <i>Red Ginseng, Aconiti Lateralis Radix Praeparata</i> | <i>Panax ginseng C.A.Mey.; Aconitum carmichaeli Debeaux</i>            | Aconitine, < 0.1mg/mL ; Ginsenoside Rb1, > 0.5mg/mL                        | Reviving Yang to prevent collapse and Reinforcing Qi and Restoring Yang                      | Syndrome of syncope of Yang Qi burst; palpitation, panting, cough, stomachache, diarrhea, arthralgia caused by Yang deficiency (Qi deficiency), etc. | Itching, facial flushing; nausea, vomiting, diarrhea; dizziness, headache, chills, high fever, difficulty breathing | Y-National Pharmaceutical Standard Z51020664, Z20043116, Z51021920, Z20043117; Standard number: WS3-B-342 7-98  | N |
| Shenmai injection | Ya'an Sanjiu Pharmaceutical Co., Ltd.; Zhengda Qingchunbao Pharmaceutical Co., Ltd.; Hebei Shenwei Pharmaceutical Co., Ltd.; | <i>Red Ginseng, Radix Ophiopogonis</i>                 | <i>Panax ginseng C.A.Mey.; Ophiopogon japonicus (Thunb.) Ker Gawl.</i> | Ginsenoside Re, 0.80-2.00 mg/mL; Total amount of ginsenoside Rg1 and Re, > | Reinforcing Qi and Restoring Yang, replenishing Yin to promote production of body fluids and | Shock of deficiency of both qi and yin, coronary heart virus myocarditis, chronic pulmonale                                                          | Allergies; systemic damage; shortness of breath, cough; arrhythmia, tachycardia, increased blood pressure; nausea,  | Y-National Pharmaceutical Standard Z51021845, Z33020019, Z13020889, Z51021353, Z53021720, Z51021263, Z20093649; | N |

Sichuan Chuanda  
West China  
Pharmaceutical  
Co., Ltd.;  
Yunnan Gejiu  
Biopharmaceutica  
l Co., Ltd.;  
Sichuan Shenghe  
Pharmaceutical  
Co., Ltd.;  
Dali  
Pharmaceutical  
Co., Ltd.

0.10mg/m  
L

generatin  
g  
meridian

and  
granulocyto  
penia can  
improve the  
immune  
function of  
cancer  
patients,  
enhance  
their  
immune  
function  
when  
combined  
with  
chemothera  
peutic  
drugs, and  
reduce the  
toxic and  
side effects  
caused by  
chemothera  
peutic  
drugs.

vomiting;  
dizziness,  
headache; rash,  
itching,  
phlebitis, lower  
back pain, etc.

National  
Food and  
Drug  
Administrati  
on National  
Drug  
Standard  
WS3-B-342  
8-98-2010Z

|                                |                                                                     |                                                                                |                                                                                                      |                                                                                                                                 |                                                                |                                                                                                                                                                                                                                                           |                                                                 |                                                                                                                     |   |
|--------------------------------|---------------------------------------------------------------------|--------------------------------------------------------------------------------|------------------------------------------------------------------------------------------------------|---------------------------------------------------------------------------------------------------------------------------------|----------------------------------------------------------------|-----------------------------------------------------------------------------------------------------------------------------------------------------------------------------------------------------------------------------------------------------------|-----------------------------------------------------------------|---------------------------------------------------------------------------------------------------------------------|---|
| Shenqifu<br>zheng<br>injection | Livzon Group<br>Limin<br>Pharmaceutical<br>Factory                  | <i>Codonopsis<br/>Radix,<br/>Astmgali<br/>Radix</i>                            | <i>Codonopsi<br/>s pilosula<br/>(Franch.)<br/>Nannf.;<br/>Astragalus<br/>mongholic<br/>us Bunge.</i> | Total<br>solids, ><br>13.0mg/m<br>L;<br>Astragalo<br>side IV,<br>0.12-0.40<br>mg/mL;<br>Anhydrou<br>s glucose,<br>><br>3.5mg/mL | Reinforci<br>ng Qi and<br>reinforcin<br>g the<br>healthy<br>Qi | Spleen-lung<br>Qi<br>deficiency<br>causes<br>fatigue,<br>lack of Qi<br>and<br>laziness,<br>and<br>dizziness<br>due to<br>spontaneou<br>s sweating.<br>Auxiliary<br>treatment<br>for lung<br>cancer and<br>gastric<br>cancer with<br>the above<br>symptoms | Mild bleeding,<br>low fever,<br>stomatitis,<br>drowsiness       | Y-National<br>Pharmaceuti<br>cal Standard<br>Z19990065,<br>Standard<br>Number<br>WS3-387(Z-<br>50)-2003(Z-<br>-2011 | N |
| Shengma<br>i<br>injection      | Changshu<br>Leiyunshang<br>Pharmaceutical<br>Co., Ltd.;<br>Shanghai | <i>Red Ginseng<br/>100g, Radix<br/>Ophiopogoni<br/>s 312g,<br/>Schisandrae</i> | <i>Panax<br/>ginseng<br/>C.A.Mey.;<br/>Ophiopog<br/>on</i>                                           | Ginsenosid<br>e Rg1,<br>><br>0.08mg/m<br>L;                                                                                     | Reinforci<br>ng Qi,<br>nourishin<br>g Yin,<br>restoring        | Palpitation,<br>shortness of<br>breath, cold<br>limbs,<br>sweating,                                                                                                                                                                                       | Allergic<br>reactions;<br>systemic<br>damage; rash,<br>itching, | Y-National<br>Pharmaceuti<br>cal Standard<br>Z20044155,<br>Z31020219,                                               | N |

|                                                               |                     |                    |             |          |             |                  |            |
|---------------------------------------------------------------|---------------------|--------------------|-------------|----------|-------------|------------------|------------|
| Hutchison<br>Pharmaceutical<br>Co., Ltd.;                     | <i>Chinensis</i>    | <i>japonicus</i>   | Ginsenoside | meridian | desperate   | sweating;        | Z51021882, |
| Ya'an Sanjiu<br>Pharmaceutical<br>Co., Ltd.;                  | <i>Fructus</i> 156g | <i>(Thunb.)</i>    | de Re, >    | and      | pulse and   | digestive        | Z20053993, |
| Jiangsu suzhong<br>pharmaceutical<br>group co. LTD.;          |                     | <i>Ker</i>         | 0.04mg/m    | securing | myocardial  | system damage;   | Z51021356, |
| Sichuan Chuanda<br>West China<br>Pharmaceutical<br>Co., Ltd.; |                     | <i>Gawl.;</i>      | L;          | the      | infarction, | heart            | Z51022475, |
| Wuliangye Group<br>Yibin<br>Pharmaceutical<br>Co., Ltd.;      |                     | <i>Schisandr</i>   | Schisandri  | prolapse | cardiogenic | palpitations,    | Z14020812, |
| Shanxi Taihang<br>Pharmaceutical<br>Co., Ltd.;                |                     | <i>a chinensis</i> | n A, >      |          | shock,      | increased blood  | Z22025251; |
| Jilin Jian Yisheng<br>Pharmaceutical<br>Co., Ltd.             |                     | <i>(Turcz.)</i>    | 3µg/mL      |          | septic      | pressure,        | Executive  |
|                                                               |                     | <i>Baill.</i>      |             |          | shock       | arrhythmia,      | Standard   |
|                                                               |                     |                    |             |          | according   | decreased        | WS3-B-286  |
|                                                               |                     |                    |             |          | to the      | blood pressure;  | 5-98       |
|                                                               |                     |                    |             |          | above       | damage to the    |            |
|                                                               |                     |                    |             |          | syndromes   | mental and       |            |
|                                                               |                     |                    |             |          |             | nervous          |            |
|                                                               |                     |                    |             |          |             | system;          |            |
|                                                               |                     |                    |             |          |             | respiratory      |            |
|                                                               |                     |                    |             |          |             | system damage;   |            |
|                                                               |                     |                    |             |          |             | phlebitis, local |            |
|                                                               |                     |                    |             |          |             | pain; Pain,      |            |
|                                                               |                     |                    |             |          |             | myalgia,         |            |
|                                                               |                     |                    |             |          |             | abnormal         |            |
|                                                               |                     |                    |             |          |             | vision           |            |



|                             |                                                                                                       |                                                                    |                                                       |                                                                                       |                                                                                                  |                                                                                                                                                                                    |                                                                                                                                                                                                                                                                                                                                                                            |                                                                                                                                |   |
|-----------------------------|-------------------------------------------------------------------------------------------------------|--------------------------------------------------------------------|-------------------------------------------------------|---------------------------------------------------------------------------------------|--------------------------------------------------------------------------------------------------|------------------------------------------------------------------------------------------------------------------------------------------------------------------------------------|----------------------------------------------------------------------------------------------------------------------------------------------------------------------------------------------------------------------------------------------------------------------------------------------------------------------------------------------------------------------------|--------------------------------------------------------------------------------------------------------------------------------|---|
| Xiaoaipin<br>g<br>injection | Tonghua Jinma<br>Pharmaceutical<br>Group Co., Ltd.;<br>Nanjing Shenghe<br>Pharmaceutical<br>Co., Ltd. | <i>Marsdeniae<br/>Tenacissima<br/>e Caulis</i><br>Extract<br>200ml | <i>Marsdenia<br/>tenacissima<br/>(Roxb.)<br/>Moon</i> | Total<br>solids,<br>35.0-45.0<br>mg/mL;<br>Chlorogen<br>ic acid,<br>9.0-13.0m<br>g/mL | Clearing<br>heat and<br>detoxifyin<br>g,<br>resolving<br>phlegm<br>and<br>softening<br>hard mass | Esophageal<br>cancer,<br>gastric<br>cancer,<br>lung cancer<br>and liver<br>cancer can<br>be treated<br>with<br>adjuvant<br>therapy of<br>radiotherap<br>y and<br>chemothera<br>py. | Allergic<br>reactions,<br>anaphylactic<br>shock;<br>migratory<br>muscle pain,<br>joint pain;<br>systemic<br>reactions; rash,<br>itching,<br>sweating;<br>digestive<br>system damage;<br>respiratory<br>system damage;<br>chest tightness,<br>palpitations,<br>increased or<br>decreased<br>blood pressure;<br>dizziness,<br>headache;<br>injection Site<br>pain, phlebitis | Y-National<br>Pharmaceuti<br>cal Standard<br>Z20025869,<br>Z20025868;<br>Standard<br>Number<br>WS-10630-(<br>ZD-0630)-2<br>002 | N |
| Javanica<br>oil             | Guangzhou<br>Baiyunshan                                                                               | <i>Bruceae<br/>Fructus</i> oil                                     | <i>Brucea<br/>javanica</i>                            | Oleic<br>acid,                                                                        | Anticance<br>r drug                                                                              | Lung<br>cancer,                                                                                                                                                                    | No obvious<br>toxic and side                                                                                                                                                                                                                                                                                                                                               | Y-National<br>Pharmaceuti                                                                                                      | N |

---

|                       |                                                                                                                                                                           |       |            |                    |                                                                           |                                                                                                                   |                                                                                                    |
|-----------------------|---------------------------------------------------------------------------------------------------------------------------------------------------------------------------|-------|------------|--------------------|---------------------------------------------------------------------------|-------------------------------------------------------------------------------------------------------------------|----------------------------------------------------------------------------------------------------|
| emulsion<br>injection | Mingxing<br>Pharmaceutical<br>Co., Ltd.;<br>Jiangsu Jiuxu<br>Pharmaceutical<br>Co., Ltd.;<br>Pharmaceutical<br>University of<br>LeiYunShang<br>Pharmaceutical<br>Co. Ltd. | 100mL | (L.) Merr. | 9.0-12.0%<br>(g/g) | brain<br>metastasis<br>of lung<br>cancer and<br>digestive<br>tract tumors | effects, and<br>occasional<br>gastrointestinal<br>discomfort such<br>as greasy<br>feeling, nausea<br>and anorexia | cal Standard<br>Z44021325,<br>Z19993152,<br>Z21020639;<br>Standard<br>number:<br>WS3-B-273<br>9-97 |
|-----------------------|---------------------------------------------------------------------------------------------------------------------------------------------------------------------------|-------|------------|--------------------|---------------------------------------------------------------------------|-------------------------------------------------------------------------------------------------------------------|----------------------------------------------------------------------------------------------------|

---

**Direct comparison between studies and subgroup analysis results**

| Subgroup-injection                   | Clinical effectiveness rate |               |                   |                | <b>Performance status</b> |               |                   |                |
|--------------------------------------|-----------------------------|---------------|-------------------|----------------|---------------------------|---------------|-------------------|----------------|
|                                      | Number of RCT               | Inconsistency | RR (95% CI)       | <i>P</i> value | Number of RCT             | Inconsistency | RR (95% CI)       | <i>P</i> value |
| Aidi injection + NP vs NP            | 19                          | P=0.86        | 1.20 (1.07, 1.35) | 0.001          | 12                        | <b>P=0.04</b> | 1.47 (1.33, 1.63) | <0.00001       |
| Chansu injection + NP vs NP          | 1                           | -             | 1.23 (0.76, 1.98) | 0.40           | 1                         | -             | 1.26 (0.99, 1.60) | 0.07           |
| Delisheng injection + NP vs NP       | 2                           | P=0.11        | 1.43 (0.96, 2.13) | 0.08           | 2                         | P=0.16        | 1.26 (1.00, 1.57) | 0.05           |
| Compound Kushen injection + NP vs NP | 8                           | P=0.97        | 1.44 (1.19, 1.73) | 0.0002         | 8                         | <b>P=0.03</b> | 1.25 (1.13, 1.37) | <0.00001       |
| Huachansu injection + NP vs NP       | 3                           | P=0.84        | 1.52 (1.05, 2.19) | 0.03           | 2                         | P=0.71        | 1.30 (1.06, 1.60) | 0.01           |
| Huangqi injection + NP vs NP         | 1                           | -             | 1.01 (0.56, 1.83) | 0.97           | 1                         | -             | 1.16 (0.85, 1.58) | 0.35           |
| Kangai injection + NP vs NP          | 7                           | P=0.59        | 1.21 (1.04, 1.40) | 0.01           | 3                         | P=0.59        | 1.24 (1.11, 1.38) | 0.0001         |
| Kanglaite injection + NP vs NP       | 10                          | P=0.62        | 1.44 (1.23, 1.67) | <0.00001       | 8                         | P=0.07        | 1.28 (1.17, 1.40) | <0.00001       |
| Shenfu injection + NP vs NP          | 6                           | P=0.09        | 1.10 (0.90, 1.36) | 0.36           | 4                         | P=0.24        | 1.07 (0.98, 1.17) | 0.13           |
| Shenmai injection + NP vs NP         | 7                           | P=0.56        | 1.33 (1.10, 1.61) | 0.003          | 4                         | P=0.87        | 1.76 (1.33, 2.32) | <0.0001        |
| Shenqifuzheng injection + NP vs NP   | 8                           | P=0.99        | 1.18 (0.98, 1.42) | 0.08           | 8                         | P=0.55        | 1.48 (1.29, 1.70) | <0.00001       |
| Shengmai injection + NP vs NP        | 4                           | P=0.96        | 1.15 (0.84, 1.58) | 0.37           | 3                         | P=0.93        | 1.47 (1.12, 1.94) | 0.006          |
| Xiaoaping injection + NP vs NP       | 1                           | -             | 1.33 (0.53, 3.35) | 0.54           | 1                         | -             | 1.77 (1.15, 2.73) | 0.010          |
| Yadanziyouru injection + NP vs NP    | 8                           | P=0.75        | 1.12 (0.96, 1.30) | 0.15           | 6                         | P=1.00        | 1.58 (1.38, 1.80) | <0.00001       |

| Subgroup-injection                   | <b>Leukopenia</b> |                     |                   |                | Hemoglobin reduction |               |                   |                |
|--------------------------------------|-------------------|---------------------|-------------------|----------------|----------------------|---------------|-------------------|----------------|
|                                      | Number of RCT     | Inconsistency       | RR (95% CI)       | <i>P</i> value | Number of RCT        | Inconsistency | RR (95% CI)       | <i>P</i> value |
| Aidi injection + NP vs NP            | 18                | <b>P&lt;0.00001</b> | 0.63 (0.53, 0.75) | <0.00001       | 6                    | P=0.79        | 0.65 (0.48, 0.88) | 0.005          |
| Delisheng injection + NP vs NP       | 2                 | P=0.76              | 0.65 (0.49, 0.87) | 0.004          | 1                    | -             | 0.17 (0.06, 0.50) | 0.001          |
| Compound Kushen injection + NP vs NP | 8                 | P=0.35              | 0.75 (0.68, 0.84) | <0.00001       | 2                    | P=0.68        | 0.67 (0.47, 0.96) | 0.03           |
| Huachansu injection + NP vs NP       | 2                 | P=0.29              | 0.64 (0.48, 0.87) | 0.004          | -                    | -             | -                 | -              |
| Huangqi injection + NP vs NP         | 1                 | -                   | 0.81 (0.56, 1.18) | 0.27           | -                    | -             | -                 | -              |
| Kangai injection + NP vs NP          | 7                 | <b>P=0.001</b>      | 0.71 (0.56, 0.89) | 0.003          | 2                    | P=0.68        | 0.87 (0.74, 1.03) | 0.10           |
| Kanglaite injection + NP vs NP       | 7                 | <b>P&lt;0.00001</b> | 0.60 (0.38, 0.93) | 0.02           | -                    | -             | -                 | -              |
| Shenfu injection + NP vs NP          | 5                 | P=0.34              | 0.61 (0.49, 0.77) | <0.0001        | 3                    | P=0.78        | 0.76 (0.55, 1.04) | 0.08           |
| Shenmai injection + NP vs NP         | 7                 | P=0.54              | 0.52 (0.42, 0.64) | <0.00001       | 2                    | P=0.21        | 0.50 (0.32, 0.79) | 0.003          |
| Shenqifuzheng injection + NP vs NP   | 8                 | P=0.10              | 0.65 (0.53, 0.79) | <0.0001        | 5                    | P=0.88        | 0.58 (0.42, 0.81) | 0.001          |
| Shengmai injection + NP vs NP        | 4                 | P=0.93              | 0.67 (0.54, 0.82) | 0.0002         | 2                    | P=0.60        | 0.66 (0.45, 0.98) | 0.04           |
| Xiaoaping injection + NP vs NP       | 1                 | -                   | 0.67 (0.40, 1.11) | 0.12           | 1                    | -             | 0.67 (0.36, 1.22) | 0.19           |
| Yadanziyouru injection + NP vs NP    | 8                 | <b>P=0.0006</b>     | 0.73 (0.57, 0.93) | 0.010          | 3                    | P=0.90        | 0.67 (0.51, 0.87) | 0.003          |

| Subgroup-injection                   | Thrombocytopenia |               |                   |                | <u>Gastrointestinal reactions</u> |                 |                   |                |
|--------------------------------------|------------------|---------------|-------------------|----------------|-----------------------------------|-----------------|-------------------|----------------|
|                                      | Number of RCT    | Inconsistency | RR (95% CI)       | <i>P</i> value | Number of RCT                     | Inconsistency   | RR (95% CI)       | <i>P</i> value |
| Aidi injection + NP vs NP            | 8                | P=0.60        | 0.50 (0.39, 0.65) | <0.00001       | 14                                | <b>P=0.0007</b> | 0.62 (0.52, 0.74) | <0.00001       |
| Compound Kushen injection + NP vs NP | 2                | P=0.56        | 0.69 (0.43, 1.11) | 0.13           | 8                                 | P=0.17          | 0.76 (0.67, 0.85) | <0.00001       |
| Huachansu injection + NP vs NP       | 1                | -             | 0.37 (0.18, 0.74) | 0.005          | 2                                 | P=0.010         | 0.58 (0.30, 1.12) | 0.10           |
| Huangqi injection + NP vs NP         | -                | -             | -                 | -              | 1                                 | -               | 0.80 (0.51, 1.26) | 0.34           |
| Kangai injection + NP vs NP          | 3                | P=0.82        | 0.69 (0.58, 0.82) | <0.0001        | 7                                 | <b>P=0.02</b>   | 0.74 (0.59, 0.92) | 0.008          |
| Kanglaite injection + NP vs NP       | 4                | P=0.24        | 0.67 (0.55, 0.82) | 0.0001         | 7                                 | P=0.68          | 0.66 (0.53, 0.81) | <0.0001        |
| Shenfu injection + NP vs NP          | 5                | P=0.78        | 0.66 (0.46, 0.96) | 0.03           | 4                                 | P=0.57          | 0.63 (0.53, 0.75) | <0.00001       |
| Shenmai injection + NP vs NP         | 2                | P=0.12        | 0.55 (0.35, 0.87) | 0.010          | 4                                 | P=0.82          | 0.60 (0.47, 0.77) | <0.0001        |
| Shenqifuzheng injection + NP vs NP   | 6                | P=0.93        | 0.63 (0.49, 0.82) | 0.0005         | 8                                 | P=0.17          | 0.59 (0.48, 0.74) | <0.00001       |
| Shengmai injection + NP vs NP        | 2                | P=0.61        | 0.72 (0.36, 1.43) | 0.35           | 3                                 | P=0.98          | 0.68 (0.52, 0.89) | 0.005          |
| Xiaoaiping injection + NP vs NP      | 1                | -             | 0.73 (0.35, 1.53) | 0.40           | -                                 | -               | -                 | -              |
| Yadanziyouru injection + NP vs NP    | 2                | P=0.98        | 0.78 (0.51, 1.20) | 0.26           | 4                                 | P=0.95          | 1.00 (0.81, 1.24) | 0.99           |

### Summary results of meta regression analysis

| covariate                       | groups                    | Performance status          |          | Leukopenia                   |              | Gastrointestinal reactions |          |
|---------------------------------|---------------------------|-----------------------------|----------|------------------------------|--------------|----------------------------|----------|
|                                 |                           |                             | P> t     |                              | P> t         |                            | P> t     |
| age                             | 20-80                     |                             | 0.216    |                              | 0.848        |                            | 0.339    |
|                                 | 30-80                     | tau <sup>2</sup> = 0.004833 | 0.273    | tau <sup>2</sup> = 0         | 0.739        | tau <sup>2</sup> = 0       | 0.607    |
|                                 | 40-80                     | I-squared_res = 0.00%       | 0.915    | I-squared_res = 0.00%        | 0.846        | I-squared_res = 26.36%     | 0.685    |
|                                 | 50-80                     | Adj R-squared = -8.87%      | Dropped* | Adj R-squared = 0%           | 0.498        | Adj R-squared = 0%         | 0.949    |
|                                 | 60+                       |                             | 0.106    |                              | Dropped*     |                            | Dropped* |
| DDPdose<br>(mg/m <sup>2</sup> ) | 120                       |                             | Dropped* |                              | <b>0.046</b> |                            | Dropped* |
|                                 | 20-30                     | tau <sup>2</sup> = 0        | 0.633    | tau <sup>2</sup> = 0.04557   | 0.457        | tau <sup>2</sup> = 0.06928 | 0.986    |
|                                 | 30-40 (include 30 and 40) | I-squared_res = 0.00%       | 0.588    | <b>I-squared_res = 4.32%</b> | 0.173        | I-squared_res = 32.23%     | 0.860    |
|                                 | 40-50                     | Adj R-squared = 0%          | 0.381    | <b>Adj R-squared = 8.55%</b> | 0.281        | Adj R-squared =<br>-18.79% | 0.233    |
|                                 | 60-80 (include 80)        |                             | 0.742    |                              | 0.200        |                            | 0.824    |
|                                 | 80-100                    |                             | Dropped* |                              | Dropped*     |                            | 0.446    |

Note: \*Which is dropped because of collinearity.
